# Supplementary material for: Inhibition of Bone Marrow-Derived Mesenchymal Stem Cells Homing Towards Triple-Negative Breast Cancer Microenvironment Using an Anti-PDGFRβ Aptamer
Source: PubMed Central journal article supplement — Theranostics. 2017 Aug 22;7(14):3595–607. doi: 10.7150/thno.18974 (PMC5596446; doi:10.7150/thno.18974), 2017-08-22
Supplement: thnov07p3595s1.pdf [file thnov07p3595s1.pdf]

## Supplementary Figures

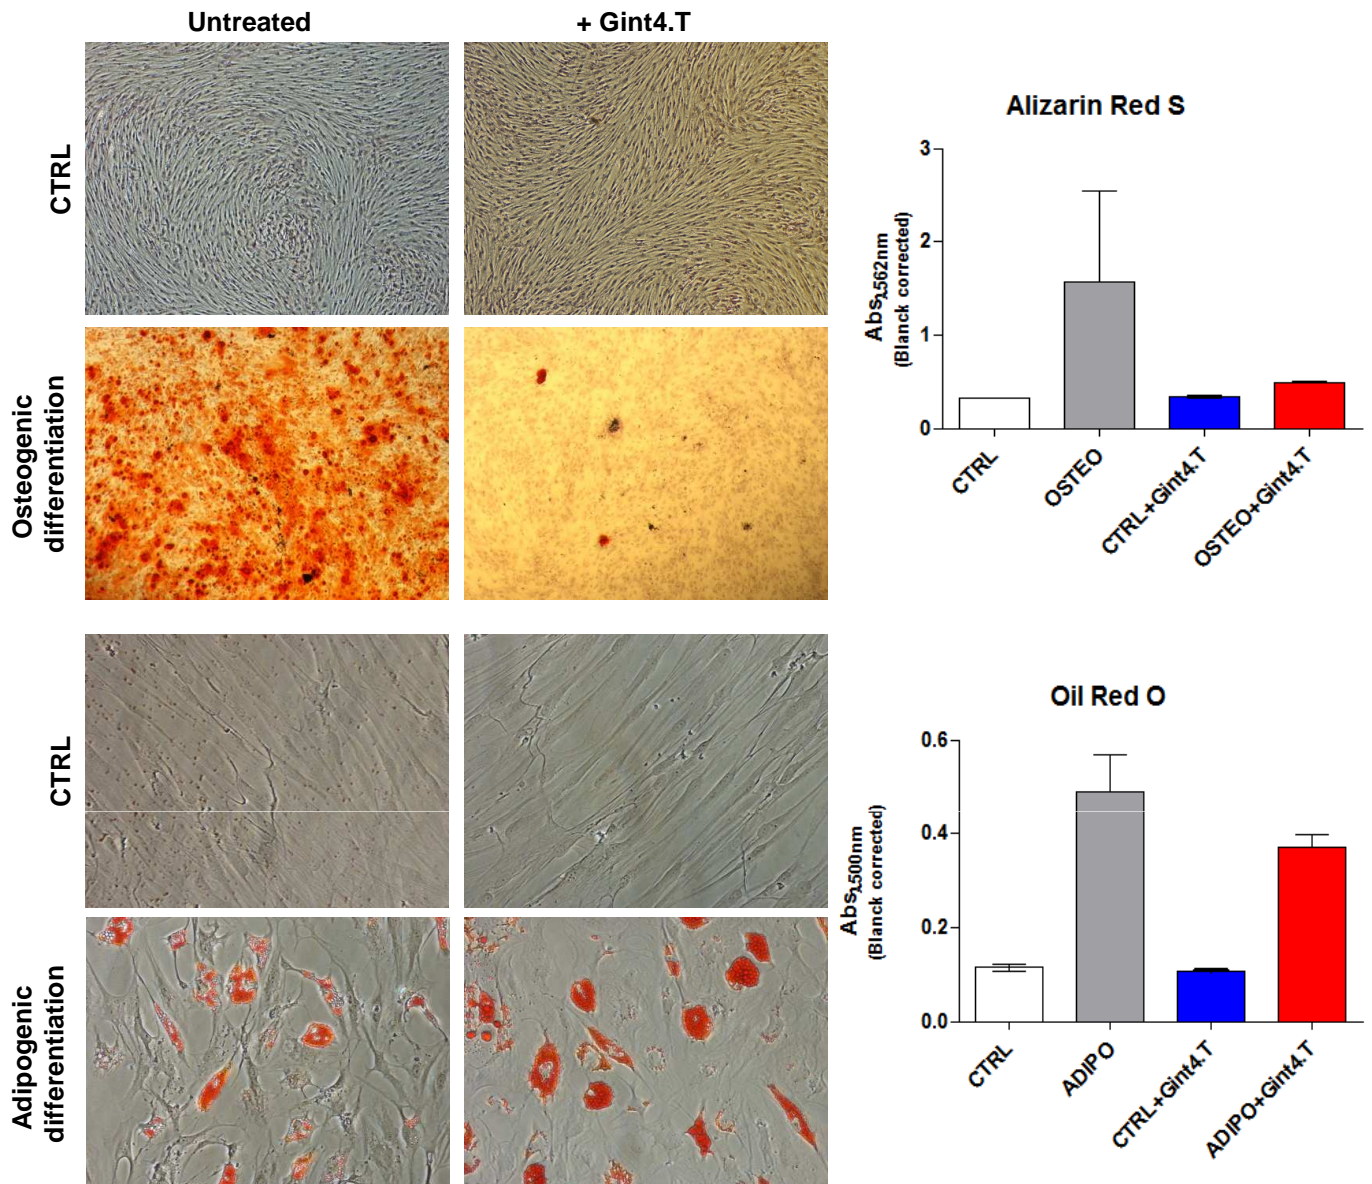

**Figure S1. Gint4.T aptamer affects osteogenic but not adipogenic differentiation of BM-MSC.** BM-MSC cells were induced to differentiate into osteoblasts or adipocytes, in absence or presence of 400 nmol/l Gint4.T by renewing aptamer treatment each 7 days, and stained with Alizarin red S (osteogenic differentiation) or Oil red O (adipogenic differentiation). Representative images are shown (left). Quantitative analyses of osteoblast and adipocyte differentiation were performed by measuring the OD at 562 nm and 500 nm, respectively (right).

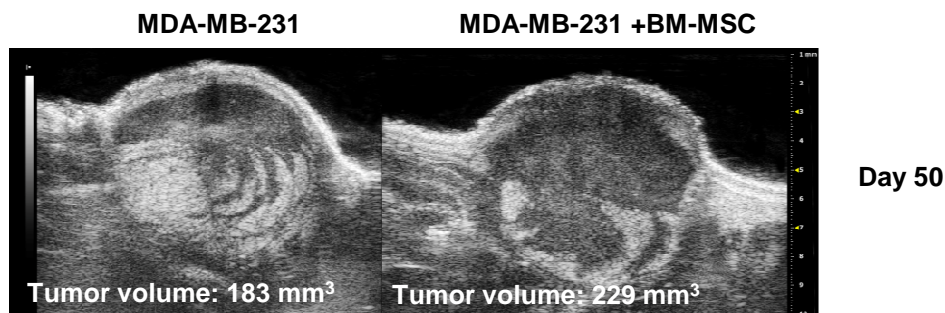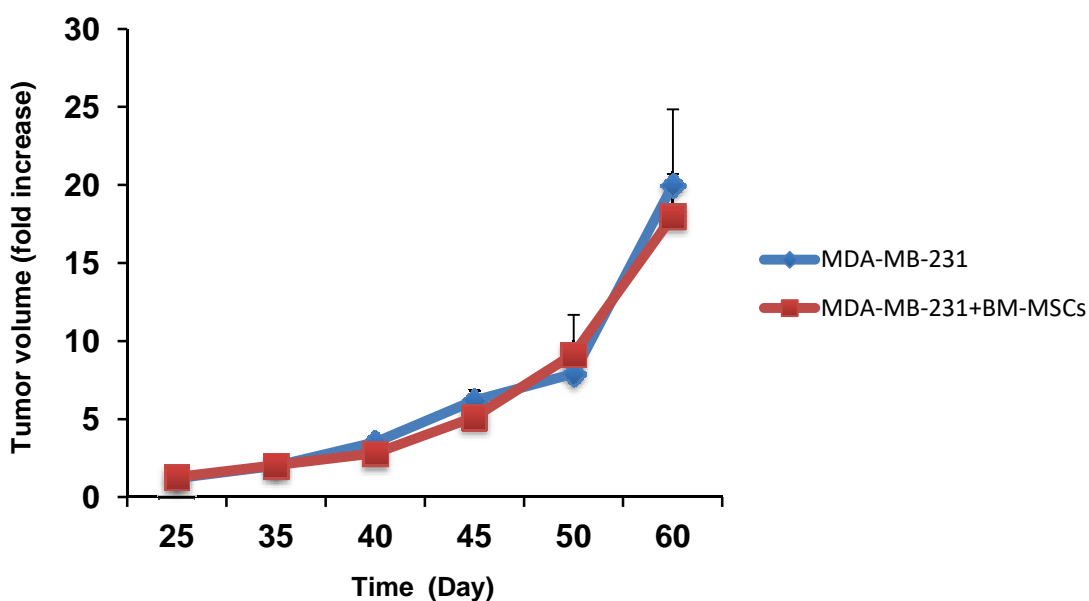

**Figure S2. Tumor growth of MDA-MB-231 cells co-injected with BM-MS Cs in mammary fat pad of immunocompromised mice.** MDA-MB-231/GFP cells alone or mixed with BM-MS Cs were injected in mice and tumor volumes were measured by high-frequency ultrasound over time. Representative images at day 50 were shown (upper panels). Tumor volumes (expressed as fold increase relative to day 25 after cell injection) were interpolated with no curve fitting or regression analysis (lower ).
